# Supplementary material for: Antisecretory factor in breastmilk is associated with reduced incidence of sepsis in preterm infants
Source: PubMed Central journal article supplement (PMC10899102; doi:10.1038/s41390-023-02909-3), 2023-11-24
Supplement: 41390_2023_2909_MOESM1_ESM.pdf [file 41390_2023_2909_MOESM1_ESM.pdf]

**Supplementary table 1. The plasma protein panel (ProSeek)**

| <u>Abbreviation</u> | <u>Protein</u>                                                |
|---------------------|---------------------------------------------------------------|
| ADA                 | Adenosine Deaminase                                           |
| ARTN                | Artemin*                                                      |
| AXIN1               | Axin-1                                                        |
| BetaNGF             | Beta-nerve growth factor*                                     |
| CCL19               | C-C motif chemokine 19                                        |
| CCL20               | C-C motif chemokine 20                                        |
| CCL23               | C-C motif chemokine 23                                        |
| CCL25               | C-C motif chemokine 25                                        |
| CCL28               | C-C motif chemokine 28 *                                      |
| CCL3                | C-C motif chemokine 3                                         |
| CCL4                | C-C motif chemokine 4                                         |
| CXCL1               | C-X-C motif chemokine 1**                                     |
| CXCL10              | C-X-C motif chemokine 10                                      |
| CXCL11              | C-X-C motif chemokine 11                                      |
| CXCL5               | C-X-C motif chemokine 5                                       |
| CXCL6               | C-X-C motif chemokine 6                                       |
| CXCL9               | C-X-C motif chemokine 9                                       |
| CASP8               | Caspase-8                                                     |
| CD40                | CD40L receptor                                                |
| CDCP1               | CUB domain-containing protein 1                               |
| CST5                | Cystatin D                                                    |
| DNER                | Delta and Notch-like epidermal growth factor-related receptor |
| CCL11               | C-X-C motif chemokine 11                                      |
| X4EBP1              | Eukaryotic translation initiation factor 4E-binding protein 1 |
| FGF19               | Fibroblast growth factor 19                                   |
| FGF21               | Fibroblast growth factor 21                                   |
| FGF23               | Fibroblast growth factor 23                                   |
| FGF5                | Fibroblast growth factor 5*                                   |
| Flt3L               | Fms-related tyrosine kinase 3 ligand                          |
| CX3CL1              | Fractalkine                                                   |
| GDNF                | Glial cell line-derived neurotrophic factor*                  |
| HGF                 | Hepatocyte growth factor                                      |
| IFNg                | Interferon gamma*                                             |
| IL1A                | Interleukin-1 alpha*                                          |
| IL10                | Interleukin-10                                                |
| IL10RA              | Interleukin-10 receptor subunit alpha*                        |
| IL10RB              | Interleukin-10 receptor subunit beta                          |
| IL12B               | Interleukin-12 subunit beta                                   |
| IL13                | Interleukin-13*                                               |
| IL15RA              | Interleukin-15 receptor subunit alpha*                        |
| IL17A               | Interleukin-17A*                                              |
| IL17C               | Interleukin-17C*                                              |
| IL18                | Interleukin-18**                                              |

|          |                                                              |
|----------|--------------------------------------------------------------|
| IL18R1   | Interleukin-18 receptor 1                                    |
| IL2      | Interleukin-2*                                               |
| IL2RB    | Interleukin-2 receptor subunit beta*                         |
| IL20     | Interleukin-20*                                              |
| IL20RA   | Interleukin-20 receptor subunit alpha*                       |
| IL22RA1  | Interleukin-22 receptor subunit alpha-1*                     |
| IL24     | Interleukin-24*                                              |
| IL33     | Interleukin-33*                                              |
| IL4      | Interleukin-4*                                               |
| IL5      | Interleukin-5*                                               |
| IL6      | Interleukin-6                                                |
| IL7      | Interleukin-7*                                               |
| IL8      | Interleukin-8                                                |
| LAPTGFβ1 | Latency-associated peptide transforming growth factor beta-1 |
| LIF      | Leukemia inhibitory factor*                                  |
| LIFR     | Leukemia inhibitory factor receptor                          |
| CSF1     | Macrophage colony-stimulating factor 1                       |
| MMP1     | Matrix metalloproteinase 1                                   |
| MMP10    | Matrix metalloproteinase-10                                  |
| MCP1     | Monocyte chemotactic protein 1**                             |
| MCP2     | Monocyte chemotactic protein 2                               |
| MCP3     | Monocyte chemotactic protein 3*                              |
| MCP4     | Monocyte chemotactic protein 4                               |
| CD244    | Natural killer cell receptor 2B4                             |
| NT3      | Neurotrophin-3*                                              |
| NRTN     | Neurturin*                                                   |
| OSM      | Oncostatin-M                                                 |
| OPG      | Osteoprotegerin                                              |
| PDL1     | Programmed cell death 1 ligand 1*                            |
| ENRAGE   | Protein S100-A12                                             |
| SLAMF1   | Signaling lymphocytic activation molecule*                   |
| SIRT2    | SIR2-like protein 2                                          |
| STAMBP   | STAM-binding protein                                         |
| SCF      | Stem cell factor**                                           |
| ST1A1    | Sulfotransferase 1A1*                                        |
| CD6      | T cell surface glycoprotein CD6 isoform                      |
| CD5      | T-cell surface glycoprotein CD5                              |
| CD8A     | T-cell surface glycoprotein CD8 alpha chain**                |
| TSLP     | Thymic stromal lymphopoietin*                                |
| TNFβ     | TNF-beta                                                     |
| TRANCE   | TNF-related activation-induced cytokine                      |
| TRAIL    | TNF-related apoptosis-inducing ligand                        |
| TGFα     | Transforming growth factor alpha                             |
| TWEAK    | Tumor necrosis factor (Ligand) superfamily, member 12        |

|         |                                                       |
|---------|-------------------------------------------------------|
| TNF     | Tumor necrosis factor*                                |
| TNFSF14 | Tumor necrosis factor ligand superfamily member 14    |
| TNFRSF9 | Tumor necrosis factor receptor superfamily member 9** |
| uPA     | Urokinase-type plasminogen activator**                |
| VEGFA   | Vascular endothelial growth factor A                  |

\* Excluded due to >20% of samples below limit of detection (LOD)

\*\* Excluded due to low number of samples analyzed
