# Supplementary material for: Antisecretory factor in breastmilk is associated with reduced incidence of sepsis in preterm infants
Source: PubMed Central journal article supplement (PMC10899102; doi:10.1038/s41390-023-02909-3), 2023-11-24
Supplement: 41390_2023_2909_MOESM2_ESM.pdf [file 41390_2023_2909_MOESM2_ESM.pdf]

**Supplementary table 2. Correlations between antisecretory factor-compleasome in mothers own milk (AF MOM) and infant plasma proteins (PI)**

| Protein  | AF MOM wk 1-       |    | AF MOM wk 1-       |    | AF MOM wk 1-        |    | AF MOM wk 4-       |    | AF MOM wk 4-        |    | AF MOM wk 12-       |    |
|----------|--------------------|----|--------------------|----|---------------------|----|--------------------|----|---------------------|----|---------------------|----|
|          | Infant plasma wk 1 | N  | Infant plasma wk 4 | N  | Infant plasma wk 12 | N  | Infant plasma wk 4 | N  | Infant plasma wk 12 | N  | Infant plasma wk 12 | N  |
| IL8      | -.23               | 33 | -.74†              | 28 | .04                 | 33 | -.75*              | 11 | -.11                | 15 | .45                 | 16 |
| VEGFA    | -.32               | 33 | -.54**             | 28 | .18                 | 33 | -.68*              | 11 | -.03                | 15 | .40                 | 16 |
| CDCP1    | -.37*              | 33 | -.46*              | 28 | .28                 | 33 | -.39               | 11 | .59*                | 15 | .78**               | 16 |
| CD244    | -.23               | 33 | -.17               | 19 | .42*                | 25 | -.31               | 11 | .27                 | 11 | .67**               | 16 |
| OPG      | -.35               | 24 | -.71**             | 28 | .21                 | 33 | -.71               | 7  | .18                 | 15 | .47                 | 12 |
| LAPTFGB1 | -.16               | 33 | -.42*              | 24 | .44*                | 29 | -.66*              | 11 | .18                 | 12 | .19                 | 16 |
| IL6      | -.16               | 30 | -.45*              | 28 | .17                 | 33 | -.79*              | 8  | -.17                | 15 | .59*                | 13 |
| CXCL11   | .04                | 33 | -.37               | 28 | .36*                | 33 | -.26               | 11 | .00                 | 15 | .33                 | 16 |
| AXIN1    | -.22               | 33 | -.26               | 28 | .19                 | 33 | -.49               | 11 | .19                 | 15 | .56*                | 16 |
| TRAIL    | -.29               | 33 | -.34               | 28 | .28                 | 33 | -.19               | 11 | .23                 | 15 | .60*                | 16 |
| CXCL9    | -.34               | 33 | -.47*              | 28 | .46**               | 33 | -.39               | 11 | .02                 | 15 | .55*                | 16 |
| CST5     | -.25               | 33 | -.27               | 28 | .08                 | 33 | -.52               | 11 | .11                 | 15 | .41                 | 16 |
| OSM      | -.23               | 33 | -.56**             | 28 | .14                 | 33 | -.65*              | 11 | .32                 | 15 | .33                 | 16 |
| CCL4     | -.15               | 33 | -.50**             | 28 | .18                 | 33 | -.67*              | 11 | .16                 | 15 | .47                 | 16 |
| CD6      | -.18               | 33 | -.06               | 28 | .28                 | 33 | -.32               | 11 | .43                 | 15 | .83†                | 16 |
| TGFA     | -.28               | 33 | -.57**             | 28 | .09                 | 33 | -.71*              | 11 | -.11                | 15 | .30                 | 16 |
| MCP4     | -.02               | 33 | -.34               | 28 | .12                 | 33 | -.29               | 11 | -.03                | 15 | .51*                | 16 |
| CCL11    | -.13               | 33 | -.35               | 28 | .14                 | 33 | -.46               | 11 | .21                 | 15 | .50*                | 16 |
| TNFSF14  | -.31               | 33 | -.62**             | 23 | .40*                | 29 | -.80**             | 11 | .30                 | 14 | .68**               | 16 |
| FGF23    | -.23               | 27 | -.51*              | 28 | .09                 | 33 | -.56               | 10 | -.04                | 15 | .12                 | 15 |
| MMP1     | -.22               | 33 | -.24               | 28 | .13                 | 33 | -.38               | 11 | .00                 | 15 | .34                 | 16 |
| LIFR     | -.26               | 33 | -.39*              | 24 | .10                 | 29 | -.49               | 11 | .16                 | 12 | .35                 | 16 |
| FGF21    | -.31               | 30 | -.13               | 28 | -.04                | 33 | -.36               | 8  | .46                 | 15 | .61*                | 13 |
| CCL19    | -.32               | 33 | -.33               | 28 | .35*                | 33 | -.51               | 11 | .27                 | 15 | .49                 | 16 |
| IL15RA   | -.37*              | 33 | -.28               | 28 | .20                 | 33 | -.58               | 11 | .23                 | 15 | .59*                | 16 |
| IL10RB   | -.25               | 33 | -.24               | 28 | .04                 | 33 | -.60               | 11 | -.01                | 15 | .27                 | 16 |
| IL18R1   | -.23               | 33 | -.39*              | 28 | .19                 | 33 | -.49               | 11 | .01                 | 15 | .39                 | 16 |
| CXCL5    | -.14               | 33 | -.34               | 28 | .43*                | 33 | -.33               | 11 | -.06                | 15 | .13                 | 16 |
| TRANSC   | -.16               | 33 | .13                | 28 | .21                 | 33 | .11                | 11 | .13                 | 15 | .16                 | 16 |
| HGF      | -.30               | 33 | -.71†              | 28 | .12                 | 33 | -.78**             | 11 | .08                 | 15 | .35                 | 16 |
| IL12B    | -.17               | 33 | .07                | 28 | .27                 | 33 | -.20               | 11 | .06                 | 15 | .40                 | 16 |
| MMP10    | -.44*              | 33 | -.40*              | 28 | .00                 | 33 | -.36               | 11 | -.16                | 15 | .19                 | 16 |
| IL10     | -.30               | 33 | -.40*              | 28 | .36*                | 33 | -.57               | 11 | .16                 | 15 | .49                 | 16 |
| CCL23    | -.26               | 33 | -.61**             | 28 | .14                 | 33 | -.61               | 11 | -.05                | 15 | .50                 | 16 |
| CD5      | .04                | 33 | .20                | 28 | .43                 | 33 | .00                | 11 | .52                 | 15 | .57*                | 16 |
| CCL3     | -.19               | 33 | -.46*              | 28 | .26                 | 33 | -.57               | 11 | .02                 | 15 | .64**               | 16 |
| Flt3L    | -.28               | 33 | -.23               | 28 | .14                 | 33 | -.52               | 11 | .11                 | 15 | .39                 | 16 |
| CXCL6    | -.12               | 33 | -.63†              | 28 | .49**               | 33 | -.45               | 11 | -.01                | 15 | .29                 | 16 |
| CXCL10   | -.16               | 33 | -.35               | 28 | .33                 | 33 | -.47               | 11 | -.05                | 15 | .60*                | 16 |
| X4EBP1   | -.26               | 33 | -.35               | 28 | .18                 | 33 | -.44               | 11 | .07                 | 15 | .33                 | 16 |
| SIRT2    | -.31               | 33 | -.41*              | 28 | .25                 | 33 | -.56               | 11 | .02                 | 15 | .40                 | 16 |
| DNER     | -.12               | 33 | -.40*              | 28 | .14                 | 33 | -.42               | 11 | .14                 | 15 | .27                 | 16 |
| ENRAGE   | -.09               | 33 | -.54**             | 28 | .07                 | 33 | -.25               | 11 | .55*                | 15 | .59*                | 16 |
| CD40     | -.28               | 33 | -.35               | 28 | .19                 | 33 | -.73               | 11 | .05                 | 15 | .58*                | 16 |
| FGF19    | -.20               | 33 | -.21               | 28 | -.02                | 33 | -.21               | 11 | .20                 | 15 | .40                 | 16 |
| MCP2     | -.18               | 33 | -.37               | 28 | .25                 | 33 | -.83               | 11 | -.08                | 15 | .48                 | 16 |
| CASP8    | .00                | 33 | -.10               | 28 | .09                 | 33 | -.36               | 11 | .35                 | 15 | .06                 | 16 |
| CCL25    | -.26               | 33 | -.59**             | 28 | .31                 | 33 | -.39               | 11 | .29                 | 15 | .51*                | 16 |
| CX3CL1   | -.27               | 33 | -.42*              | 28 | .25                 | 33 | -.51               | 11 | .10                 | 15 | .28                 | 16 |
| TWEAK    | -.14               | 33 | -.21               | 28 | .19                 | 33 | -.43               | 11 | .10                 | 15 | .53*                | 16 |
| CCL20    | -.39*              | 33 | -.34               | 28 | .14                 | 33 | -.64               | 11 | -.02                | 15 | .45                 | 16 |
| STAMBP   | -.25               | 33 | -.28               | 28 | .30                 | 33 | -.39               | 11 | .23                 | 15 | .50*                | 16 |
| ADA      | -.16               | 33 | -.23               | 28 | .15                 | 33 | -.23               | 11 | .10                 | 15 | .43                 | 16 |
| TNFB     | -.22               | 33 | .06                | 28 | .38*                | 33 | .00                | 11 | .08                 | 15 | .30                 | 16 |
| CSF1     | -.19               | 33 | -.30               | 28 | .19                 | 33 | -.51               | 11 | .04                 | 15 | .48                 | 16 |

\*=  $p < 0.05$

\*\*=  $p < 0.01$

†=  $p < 0.001$

Rho = Correlation coefficient Spearman's rho

wk = week
