# Supplementary material for: Antisecretory factor in breastmilk is associated with reduced incidence of sepsis in preterm infants
Source: PubMed Central journal article supplement (PMC10899102; doi:10.1038/s41390-023-02909-3), 2023-11-24
Supplement: 41390_2023_2909_MOESM3_ESM.pdf [file 41390_2023_2909_MOESM3_ESM.pdf]

Supplementary table 3. Plasma proteins in infant plasma week 1, 4 and 12 after birth related to sepsis or no sepsis.

| Protein  | Week 1 |      |    |           |      |    |       | Week 4 |      |   |           |      |    |        | Week 12 |      |   |           |      |    |       |
|----------|--------|------|----|-----------|------|----|-------|--------|------|---|-----------|------|----|--------|---------|------|---|-----------|------|----|-------|
|          | Sepsis |      |    | No sepsis |      |    | p     | Sepsis |      |   | No sepsis |      |    | p      | Sepsis  |      |   | No sepsis |      |    | p     |
|          | Mdn    | IQR  | N  | Mdn       | IQR  | N  |       | Mdn    | IQR  | N | Mdn       | IQR  | N  |        | Mdn     | IQR  | N | Mdn       | IQR  | N  |       |
| IL6      | 4.43   | .95  | 9  | 4.11      | 2.39 | 29 | .450  | 3.72   | 2.04 | 8 | 2.73      | 1.81 | 23 | .082   | 2.59    | .62  | 9 | 2.81      | 1.28 | 28 | .412  |
| IL8      | 8.03   | 1.83 | 10 | 7.88      | 1.84 | 32 | .170  | 8.02   | .42  | 9 | 6.84      | 1.02 | 26 | .003** | 7.02    | .98  | 9 | 6.58      | .76  | 33 | .171  |
| IL15RA   | .74    | .82  | 10 | .82       | 1.11 | 32 | .690  | 1.44   | .94  | 9 | .96       | .99  | 26 | .239   | 1.15    | 1.17 | 9 | 1.58      | .84  | 33 | .289  |
| IL10RB   | 6.74   | .82  | 10 | 6.86      | .79  | 32 | .988  | 7.27   | .85  | 9 | 6.99      | 1.01 | 26 | .565   | 7.41    | 1.13 | 9 | 7.69      | .48  | 33 | .695  |
| IL18R1   | 6.90   | 1.35 | 10 | 6.97      | 1.11 | 32 | .647  | 7.90   | 1.57 | 9 | 7.30      | 1.14 | 26 | .197   | 7.44    | 1.41 | 9 | 7.91      | .98  | 33 | .673  |
| IL12B    | 3.67   | 1.38 | 10 | 4.31      | 1.82 | 32 | .400  | 4.39   | 2.24 | 9 | 4.90      | 1.54 | 26 | .540   | 5.66    | 1.77 | 9 | 6.45      | 1.13 | 33 | .487  |
| IL10     | 2.53   | 1.06 | 10 | 2.56      | 2.10 | 32 | .734  | 3.58   | 1.47 | 9 | 2.91      | 1.68 | 26 | .382   | 2.96    | 1.45 | 9 | 3.76      | .84  | 33 | .161  |
| VEGFA    | 10.45  | .95  | 10 | 10.37     | 1.26 | 32 | .871  | 11.15  | 1.91 | 9 | 10.45     | 1.10 | 26 | .067   | 10.33   | 1.26 | 9 | 10.66     | 1.09 | 33 | .763  |
| TGFA     | 3.06   | .51  | 10 | 2.76      | .83  | 32 | .232  | 3.01   | 1.38 | 9 | 2.45      | .94  | 26 | .023*  | 2.82    | .96  | 9 | 2.51      | .61  | 33 | .507  |
| HGF      | 7.63   | .94  | 10 | 7.58      | 1.32 | 32 | .871  | 7.77   | .58  | 9 | 6.90      | 1.31 | 26 | .013*  | 7.36    | .96  | 9 | 7.36      | .67  | 33 | .630  |
| OPG      | 6.34   | .72  | 7  | 6.42      | 1.60 | 23 | .924  | 6.86   | .88  | 6 | 6.16      | 1.47 | 19 | .138   | 7.09    | .78  | 7 | 7.10      | .53  | 25 | .532  |
| LAPTGFβ1 | 6.74   | .81  | 10 | 6.97      | 1.04 | 32 | .488  | 7.55   | .79  | 9 | 7.12      | .85  | 26 | .516   | 6.81    | .52  | 9 | 7.16      | .52  | 33 | .049* |
| TNFSF14  | 3.48   | 1.18 | 10 | 3.52      | 1.03 | 32 | .337  | 4.18   | .85  | 9 | 3.85      | .93  | 26 | .046*  | 3.35    | 1.03 | 9 | 3.91      | .64  | 33 | .028* |
| TRAIL    | 7.12   | 1.36 | 10 | 7.24      | .93  | 32 | .965  | 7.60   | .75  | 9 | 7.56      | .83  | 26 | .725   | 8.14    | 1.05 | 9 | 8.50      | .71  | 33 | .070  |
| TWEAK    | 6.89   | .63  | 10 | 7.38      | 1.03 | 32 | .220  | 7.01   | 1.60 | 9 | 7.57      | 1.25 | 26 | .643   | 7.89    | 1.44 | 9 | 8.58      | .60  | 33 | .348  |
| TNFB     | 3.79   | 1.34 | 10 | 3.98      | .80  | 32 | .988  | 3.62   | 1.04 | 9 | 4.31      | .92  | 26 | .382   | 4.86    | 1.00 | 9 | 5.75      | .86  | 33 | .092  |
| TRANCE   | 3.91   | 2.12 | 10 | 4.72      | 1.42 | 32 | .352  | 4.52   | 2.34 | 9 | 5.16      | 1.15 | 26 | .342   | 6.85    | 1.34 | 9 | 7.04      | .73  | 33 | .857  |
| MCP2     | 6.88   | 1.07 | 10 | 6.84      | 1.37 | 32 | .605  | 7.72   | 1.42 | 9 | 7.32      | 1.09 | 26 | .590   | 7.41    | .95  | 9 | 8.03      | .96  | 33 | .673  |
| MCP4     | 7.76   | 1.54 | 10 | 8.24      | 1.11 | 32 | .941  | 8.92   | 1.50 | 9 | 8.01      | .98  | 26 | .271   | 8.46    | .95  | 9 | 8.54      | 1.44 | 33 | .718  |
| MMP1     | 8.48   | .55  | 10 | 8.54      | 2.32 | 32 | .626  | 8.95   | 2.11 | 9 | 8.96      | 1.45 | 26 | .469   | 7.40    | .73  | 9 | 7.73      | 1.24 | 33 | .275  |
| MMP10    | 9.89   | .49  | 10 | 9.34      | 1.02 | 32 | .037* | 9.62   | .73  | 9 | 9.43      | .97  | 26 | .210   | 8.42    | .68  | 9 | 8.74      | 1.10 | 33 | .526  |
| CCL3     | 4.76   | .52  | 10 | 4.42      | 1.29 | 32 | .322  | 4.79   | 1.17 | 9 | 4.20      | 1.11 | 26 | .138   | 4.82    | .86  | 9 | 4.82      | .86  | 33 | .487  |
| CCL4     | 5.92   | .81  | 10 | 5.96      | 1.18 | 32 | .585  | 6.24   | 1.02 | 9 | 6.06      | 1.12 | 26 | .119   | 6.20    | .54  | 9 | 6.44      | .69  | 33 | .143  |
| CCL11    | 5.72   | 1.09 | 10 | 6.11      | 1.26 | 32 | .337  | 6.86   | .98  | 9 | 6.58      | 1.37 | 26 | .323   | 7.04    | 1.18 | 9 | 7.09      | 1.06 | 33 | .952  |
| CCL19    | 8.79   | .59  | 10 | 8.53      | 1.59 | 32 | .384  | 8.82   | 1.61 | 9 | 8.35      | 1.13 | 26 | .342   | 9.40    | 1.39 | 9 | 9.63      | 1.19 | 33 | .275  |
| CCL20    | 6.70   | 2.03 | 10 | 6.76      | 1.81 | 32 | .894  | 8.90   | 1.42 | 9 | 7.29      | 1.42 | 26 | .025*  | 7.54    | .66  | 9 | 7.37      | 1.34 | 33 | .608  |
| CCL23    | 8.98   | 1.42 | 10 | 8.60      | 1.76 | 32 | .668  | 9.31   | 2.42 | 9 | 7.55      | 1.76 | 26 | .038*  | 8.09    | 2.00 | 9 | 8.88      | 1.29 | 33 | .928  |
| CCL25    | 6.48   | 1.27 | 10 | 6.62      | 1.43 | 32 | .647  | 7.01   | 1.15 | 9 | 6.22      | 1.25 | 26 | .020*  | 6.13    | 1.08 | 9 | 6.57      | .52  | 33 | .740  |
| CXCL5    | 7.74   | .92  | 10 | 8.52      | 1.98 | 32 | .384  | 8.82   | 1.97 | 9 | 8.99      | 1.48 | 26 | .985   | 8.40    | 1.38 | 9 | 9.41      | 1.63 | 33 | .213  |
| CXCL6    | 6.86   | 1.29 | 10 | 7.12      | 1.61 | 32 | .605  | 8.22   | 1.60 | 9 | 7.40      | 1.12 | 26 | .067   | 7.87    | .43  | 9 | 8.14      | 1.34 | 33 | .348  |
| CXCL9    | 4.86   | 2.22 | 10 | 4.83      | 2.56 | 32 | .941  | 6.18   | 1.36 | 9 | 5.18      | 1.45 | 26 | .255   | 5.50    | .86  | 9 | 6.32      | 1.11 | 33 | .119  |
| CXCL10   | 5.00   | 3.04 | 10 | 5.40      | 2.74 | 32 | .626  | 6.67   | 1.72 | 9 | 5.84      | 1.97 | 26 | .288   | 6.90    | 1.39 | 9 | 7.29      | 1.87 | 33 | .224  |
| CXCL11   | 6.19   | 1.50 | 10 | 7.15      | 1.17 | 32 | .121  | 7.65   | 2.34 | 9 | 7.05      | 1.31 | 26 | .197   | 7.62    | .68  | 9 | 8.03      | 2.00 | 33 | .608  |
| CX3CL1   | 5.34   | .65  | 10 | 4.65      | 1.24 | 32 | .101  | 5.10   | 1.75 | 9 | 4.74      | 1.01 | 26 | .271   | 5.19    | 1.52 | 9 | 5.89      | 1.00 | 33 | .608  |
| CD5      | 4.92   | .98  | 10 | 5.48      | .77  | 32 | .170  | 5.02   | .93  | 9 | 5.73      | 1.16 | 26 | .067   | 6.04    | .51  | 9 | 6.32      | .60  | 33 | .065  |
| CD6      | 3.34   | 1.17 | 10 | 3.76      | .92  | 32 | .308  | 3.47   | 1.24 | 9 | 4.37      | 1.28 | 26 | .288   | 4.78    | 1.44 | 9 | 5.59      | 1.00 | 33 | .119  |
| CD40     | 9.76   | 1.53 | 10 | 9.61      | 1.00 | 32 | .802  | 10.69  | 1.14 | 9 | 9.76      | 1.00 | 26 | .061   | 10.16   | .90  | 9 | 10.54     | .58  | 33 | .695  |
| CD244    | 4.66   | 1.60 | 10 | 5.16      | .80  | 32 | .434  | 5.41   | 1.10 | 9 | 5.64      | .76  | 26 | 1.000  | 5.75    | 1.10 | 9 | 6.41      | .43  | 33 | .086  |
| CDCP1    | 1.84   | .85  | 10 | 1.96      | .99  | 32 | .918  | 2.31   | .66  | 9 | 2.23      | 1.04 | 26 | .469   | 2.09    | .87  | 9 | 2.68      | .69  | 33 | .224  |
| CSF1     | 8.64   | .44  | 10 | 8.59      | 1.23 | 32 | .894  | 9.21   | 1.07 | 9 | 8.54      | .78  | 26 | .271   | 8.70    | 1.07 | 9 | 9.41      | .96  | 33 | .718  |
| CST5     | 7.17   | .95  | 10 | 7.60      | 1.71 | 32 | .894  | 8.06   | 1.42 | 9 | 7.91      | 1.43 | 26 | .160   | 8.21    | 1.19 | 9 | 7.87      | 1.23 | 33 | .567  |
| DNER     | 8.51   | .37  | 10 | 8.68      | .82  | 32 | .469  | 9.06   | 1.06 | 9 | 8.71      | .77  | 26 | .271   | 8.60    | 1.03 | 9 | 9.25      | .77  | 33 | .303  |
| ENRAGE   | 2.35   | .74  | 10 | 2.25      | 1.72 | 32 | .825  | 3.42   | 1.86 | 9 | 2.34      | 1.78 | 26 | .056   | 1.96    | 1.80 | 9 | 1.69      | 1.08 | 33 | .857  |
| FGF19    | 7.20   | .62  | 10 | 6.24      | 1.80 | 32 | .256  | 6.74   | 2.82 | 9 | 5.76      | 1.30 | 26 | .810   | 6.22    | 1.38 | 9 | 7.33      | 2.23 | 33 | .065  |
| FGF21    | 5.39   | 1.62 | 9  | 4.07      | 1.91 | 29 | .492  | 6.55   | 4.05 | 8 | 5.92      | 1.91 | 23 | .842   | 7.97    | 2.67 | 9 | 8.12      | 5.00 | 28 | 1.000 |
| FGF23    | 5.33   | 1.13 | 8  | 4.84      | 3.25 | 26 | .270  | 4.92   | 1.39 | 7 | 3.90      | 1.35 | 22 | .055   | 4.19    | .93  | 7 | 3.62      | 1.40 | 30 | .458  |
| Flt3L    | 7.98   | .88  | 10 | 8.16      | 1.30 | 32 | .988  | 9.25   | 1.80 | 9 | 8.60      | 1.27 | 26 | .956   | 9.26    | 1.68 | 9 | 9.24      | 1.31 | 33 | .630  |
| LIFR     | 2.59   | .91  | 10 | 3.05      | .93  | 32 | .734  | 3.25   | .80  | 9 | 3.02      | .90  | 26 | .565   | 3.07    | .94  | 9 | 3.61      | .73  | 33 | .469  |
| OSM      | 2.17   | 1.56 | 10 | 2.66      | 2.20 | 32 | .605  | 3.02   | .56  | 9 | 2.12      | 1.84 | 26 | .086   | 1.31    | 2.04 | 9 | 1.95      | 1.31 | 33 | .450  |
| SIRT2    | 3.73   | 1.13 | 10 | 4.11      | 1.85 | 32 | .368  | 3.98   | .85  | 9 | 3.96      | 1.51 | 26 | .590   | 4.09    | 1.38 | 9 | 4.20      | .98  | 33 | 1.000 |
| STAMBP   | 5.09   | .80  | 10 | 5.40      | 1.39 | 32 | .322  | 5.64   | 1.24 | 9 | 5.25      | 1.49 | 26 | .781   | 4.93    | 1.35 | 9 | 5.41      | .82  | 33 | .414  |
| X4EBP1   | 9.08   | .99  | 10 | 9.50      | 1.37 | 32 | .189  | 8.93   | 1.01 | 9 | 8.82      | 1.82 | 26 | .897   | 8.38    | 1.33 | 9 | 8.84      | 1.29 | 33 | 1.000 |
| ADA      | 5.75   | .65  | 10 | 5.98      | .83  | 32 | .712  | 5.87   | .96  | 9 | 5.82      | 1.41 | 26 | .985   | 5.76    | .42  | 9 | 6.06      | .60  | 33 | .880  |
| AXIN1    | 1.75   | 1.15 | 10 | 2.20      | 1.70 | 32 | .712  | 2.85   | .55  | 9 | 2.58      | 1.12 | 26 | .424   | 2.76    | .41  | 9 | 3.00      | 1.20 | 33 | .526  |
| CASP8    | 2.11   | 1.47 | 10 | 2.48      | 1.68 | 32 | .308  | 2.06   | 1.10 | 9 | 2.22      | 1.36 | 26 | .926   | 1.45    | 1.19 | 9 | 1.90      | .89  | 33 | .546  |

Mann-Whitney U-test

Mdn = Median

\*=p <0.05

\*\*=p <0.01
